# Supplementary material for: DABCO Derived Nitrogen-Doped Carbon Nanotubes for Oxygen Reduction Reaction (ORR) and Removal of Hexavalent Chromium from Contaminated Water
Source: MDPI journal article supplement (doi:10.3390/ma14112871), 2021-05-27
Supplement: s1 [file s1]

## Supplementary Materials

# DABCO Derived Nitrogen-Doped Carbon Nanotubes for Oxygen Reduction Reaction (ORR) and Removal of Hexavalent Chromium from Contaminated Water

Vadahanambi Sridhar <sup>1,\*</sup> and Hyun Park <sup>1,2,\*</sup>

<sup>1</sup> Global Core Research Centre for Ships and Offshore Plants (GCRC-SOP), Pusan National University, Busan 46241, Korea

<sup>2</sup> Department of Naval Architecture and Ocean Engineering, Pusan National University, Busan 46241, Korea

\* Correspondence: sridhar@pusan.ac.kr (V.S.); hyunpark@pusan.ac.kr (H.P.); Tel.: +82-51-510-2730 (H.P.)

**Citation:** Sridhar, V.; Park, H. DABCO Derived Nitrogen Doped Carbon Nanotubes for Oxygen Reduction Reaction (ORR) and Removal of Hexavalent Chromium from Contaminated Water. *Materials* **2021**, *14*, 2871. <https://doi.org/10.3390/ma14112871>

Academic Editor: Julia A. Baimova

Received: 7 May 2021

Accepted: 24 May 2021

Published: 27 May 2021

**Publisher's Note:** MDPI stays neutral with regard to jurisdictional claims in published maps and institutional affiliations.

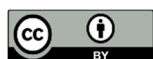

**Copyright:** © 2021 by the authors. Licensee MDPI, Basel, Switzerland. This article is an open access article distributed under the terms and conditions of the Creative Commons Attribution (CC BY) license (<http://creativecommons.org/licenses/by/4.0/>).

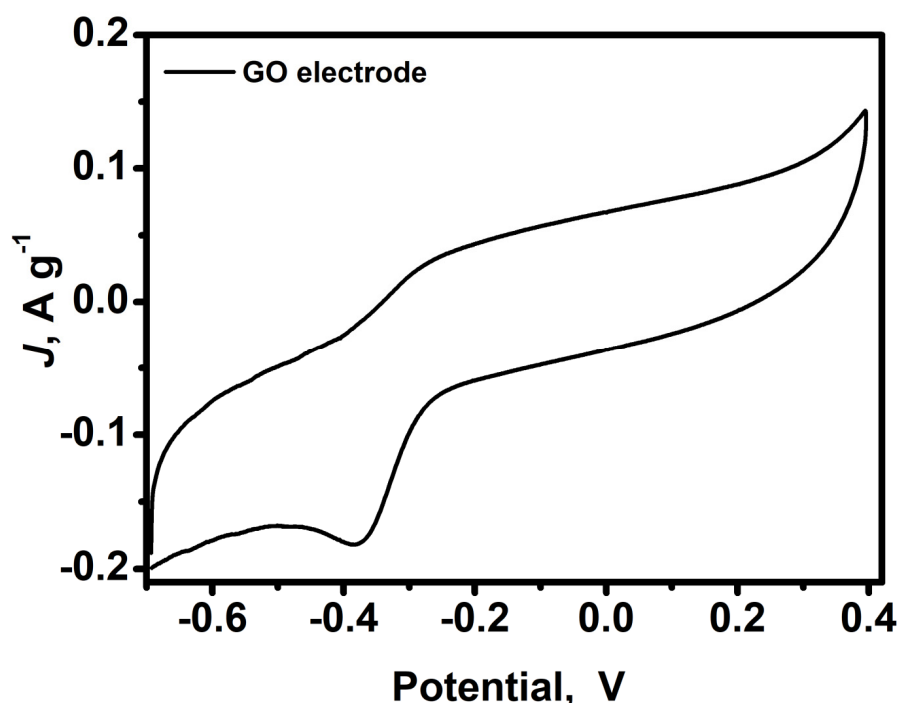

**Figure S1.** CV of GO electrode in 1 M KOH solution.
